# Supplementary material for: Solar rotational cycle in lightning activity in Japan during the 18–19th centuries
Source: Copernicus journal article supplement (doi:10.5194/angeo-36-633-2018), 2018-04-18
Supplement: Supplementary file 1 [file angeo-36-633-2018-supplement.pdf]

Supplement of Ann. Geophys., 36, 633–640, 2018  
<https://doi.org/10.5194/angeo-36-633-2018-supplement>  
© Author(s) 2018. This work is distributed under  
the Creative Commons Attribution 4.0 License.

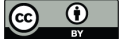

*Supplement of*

## **Solar rotational cycle in lightning activity in Japan during the 18–19th centuries**

**Hiroko Miyahara et al.**

*Correspondence to:* Hiroko Miyahara (miyahara@musabi.ac.jp)

The copyright of individual parts of the supplement might differ from the CC BY 4.0 License.

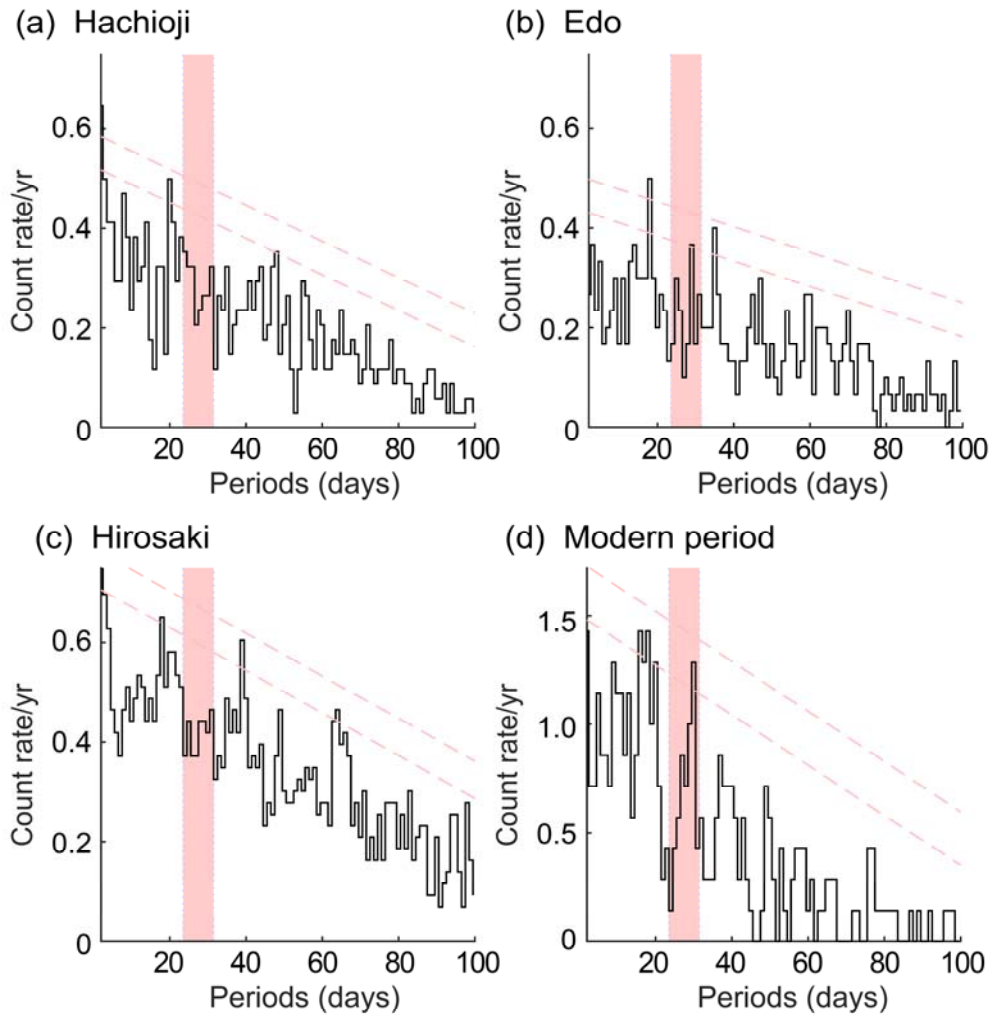

Figure S1. Periodicity of the thunder/lightning events at the declining phase of solar cycle in (a) Hachioji, (b) Edo, (c) Hirosaki in the 18th to 19th centuries, and (d) Japan in the modern period. The red dashed lines denote 2.0 and 3.0 SDs. The red shaded bars indicate the 24–31 day period.

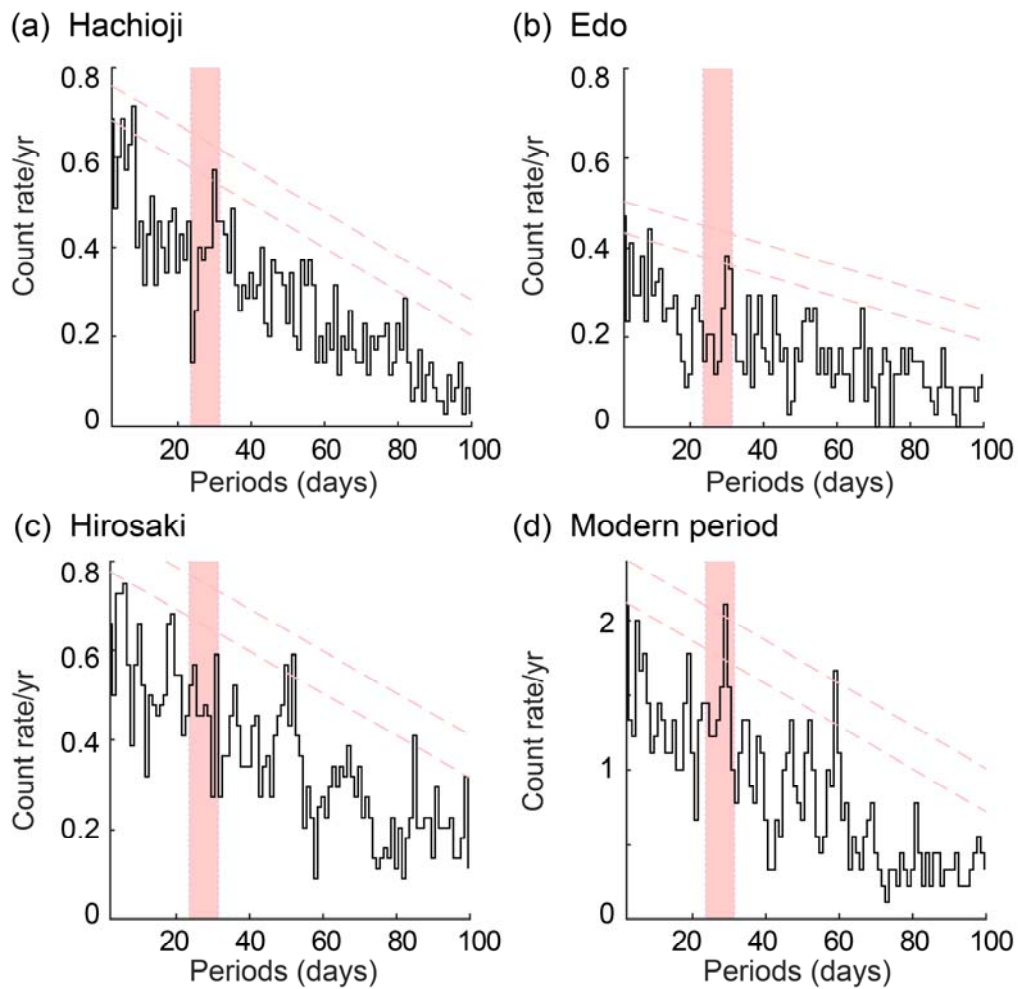

Figure S2. Periodicity of the thunder/lightning events at the maxima of solar decadal cycles in (a) Hachioji, (b) Edo, (c) Hirosaki in the 18th to 19th centuries, and (d) Japan in the modern period (1989-2014 AD). The red dashed lines denote 2.0 and 3.0 SDs. The red shaded bars indicate the 24–31 day period.

#### Acknowledgments

The F10.7 solar radio flux data were obtained from the GSFC/SPDF OMNIWeb interface at <https://omniweb.gsfc.nasa.gov>. The neutron monitor data were obtained from <http://cr0.izmiran.ru/oulu/main.htm>.
